# Supplementary material
Source: publisher site journal article supplement (https://www.dovepress.com/article/389413)
Supplement: Supplementary file 1 [file get_supplementary_file.php]

**Supplementary material**

Please provide feedback on your opinion on knowledge, attitude and practice regarding

fluoridated toothpaste, brushing and rinse usage in Jeddah city of Saudi Arabia

**Consent**

1. Do you agree to participate in the study?
   - Yes

**Eligibility**

1. Do you live in an Arab country?
   - Yes
   - No
2. Which **country** do you live in
   - __________________________
3. Which **city** do you live in
   - __________________________
4. Do you use a toothpaste to brush your teeth?
   - Yes
   - No
   - Other (please specify) _____________

**Demographic information**

1. Nationality
   - Saudi
   - Other (please specify) _____________
2. Gender
   - Male
   - Female
3. Age in years
   - __________________________
4. What is your highest level of education?
   - Elementary
   - Middle school
   - High school
   - Bachelor
   - Diploma
   - Master
   - Doctorate
   - Board
   - Other (please specify) _____________

**Attitude**

1. Do you use fluoride-containing toothpaste?
   - No
   - Yes
   - I do not know
   - Other (please specify) _____________
2. How important is **brushing** your teeth?
   - Very important
   - Important
   - Slightly important
   - Not important
   - Not important at all
3. Why did you select that answer?
   - Brushing does not make a difference in teeth health
   - Brushing makes my teeth healthy and free of caries
   - It became a habit, I do not know why I am do it
   - My parents/caregiver said it is important
   - Other (please specify) _____________
4. How important is **rinsing** the toothpaste after brushing your teeth?
   - Very important
   - Important
   - Slightly important
   - Not important
   - Not important at all
5. Why did you select that answer?
   - Rinsing does not make a difference in teeth health
   - Rinsing toothpaste
   - It became a habit, I do not know why I am do it
   - My parents/caregiver said it is important
   - Other (please specify) _____________
6. What is most important to you regarding your teeth?
   - Healthy teeth with no cavities
   - White and beautiful-looking teeth
   - Teeth with no pain
   - Other (please specify) _____________
7. How important is using a **toothpaste** to brush your teeth?
   - Very important
   - Important
   - Slightly important
   - Not important
   - Not important at all
8. Why did you select that answer?
   - Toothpaste does not make a difference in teeth health
   - Toothpaste makes my teeth healthy and free of caries
   - It became a habit, I do not know why I am do it
   - My parents/caregiver said it is important
   - Other (please specify) _____________

**Practice**

1. Do you brush your teeth with a toothbrush everyday?
   - I do not brush my teeth
   - No, I do not brush my teeth everyday
   - Yes
2. How often do you brush your teeth?
   - Once a day
   - Twice a day
   - Three times a day or more
   - Once a week
   - Other (please specify) _____________
3. When do you brush your teeth? Please select all that apply
   - After I wakeup
   - Before breakfast
   - After breakfast
   - Before lunch
   - After lunch
   - Before dinner
   - After dinner
   - Before going to bed
4. What do you use when you brush your teeth other than toothpaste? Please select all that apply
   - Water only
   - Miswak
   - Salt
   - Baking soda
   - Charcoal
   - Turmeric
   - Other (please specify) _____________
5. How often do you dip your toothbrush under running water when brushing?
   - Never dip
   - 1–2 times
   - 3 times or more
6. How long do you brush your teeth?
   - Less than 1 minute
   - 1-2 minutes
   - More than 2 minutes
   - I don’t know
7. Do you use regular or electric toothbrush?
   - Regular
   - Electric
   - Both regular and electric
8. How long have you been using non-fluoridated toothpaste?
   - Less than one year
   - 1 – 2 years
   - More than 2 years
   - 3 – 4 years
   - I do not know
9. What type of toothpaste do you use? Please check all that apply
   - Fluoridated toothpaste (examples: Close up, Colgate, Signal,...)
   - Whitening toothpaste
   - Toothpaste for sensitive teeth
   - Organic/Natural toothpaste
   - Charcoal toothpaste
   - Other (please specify) _____________
10. How much toothpaste amount do you put on your toothbrush?

-
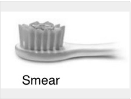

-
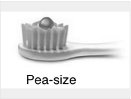

-
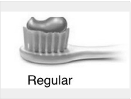


1. How long do you keep the toothpaste in your mouth after brushing?
   - I spit it out immediately
   - Less than 1 minute
   - 1 minute
   - More than 1 minute
2. Do you use dental floss to clean between your teeth?
   - No
   - Yes, Once a day
   - Yes, Twice a day
   - Yes, After every meal
   - Yes, Every two days
   - Yes, Once a week
   - Other (please specify) _____________
3. Do you use toothpicks to clean between your teeth?
   - No
   - Yes, Once a day
   - Yes, Twice a day
   - Yes, After every meal
   - Yes, Every two days
   - Yes, Once a week
   - Other (please specify) _____________
4. Do you rinse your mouth with water after brushing your teeth with a toothpaste?
   - No, I do not rinse my mouth
   - I rinse my mouth with water but I do not brush my teeth with toothpaste
   - Yes
   - Other (please specify) _____________
5. How much water do you use for rinsing?
   - A handful
   - Two handfuls
   - Half a glass of water
   - A full glass of water
6. Do you rinse your mouth with something other than water?
   - No
   - Yes, fluoridated containing mouthwash
   - Yes, mouth rinse containing chlorhexidine and zink (SB12)
   - I do not know
   - Other (please specify) _____________

**Knowledge**

1. What is most important to prevent cavities?
   - Good diet
   - Tooth brushing
   - Fluoride in toothpaste
   - Good diet, tooth brushing and fluoride in toothpaste are equally important
   - I do not know
   - Other (please specify) _____________
2. What is the effect of fluoride in toothpaste on your teeth?
   - Makes teeth whiter
   - Strengthens the teeth and prevents cavities
   - Cleans teeth and removes the plaque
   - Makes your mouth feel/smell fresh
   - I do not know
   - Other (please specify) _____________
3. Is there a difference between adults and children toothpaste in fluoride concentration?
   - No
   - Yes, Adult toothpaste contains more fluoride
   - Yes, Adult toothpaste contains less fluoride
   - I do not know
   - Other (please specify) _____________
4. At what age should you start using a fluoridated toothpaste?
   - 6 months
   - 1 – 2 years
   - 3 – 4 years
   - I do not know
   - Other (please specify) _____________
5. What’s the amount of fluoride present in adult toothpaste?
   - Less than 1000 PPM
   - 1000 PPM
   - 1450 PPM
   - 5000 PPM
   - I do not know
6. Does the miswak contain fluoride?
   - Yes
   - No
   - I do not know
7. Why do you not use fluoride-containing toothpaste?
   - Fluoride is toxic
   - Fluoride can cause fluorosis (White and brown spots on teeth)
   - Thyroid toxicity
   - Other (please specify)
8. What determines which toothpaste you use? Please select all that apply
   - Price
   - Taste
   - Advertisements
   - I use whatever is at home
   - Fluoride concentration
   - Dentist recommendation
   - Friend/Family recommendation
   - I do not know
   - Other (please specify) _____________
9. Why do some people rinse their mouth after brushing?
   - Remove toothpaste
   - Remove excess toothpaste
   - Remove caries
   - I do not know
   - Other (please specify) _____________
10. Is there anything else you would like to add? (optional)
    - __________________________

Thank you for your participation.
